# Supplementary material for: Pinostrobin Suppresses the α-Melanocyte-Stimulating Hormone-Induced Melanogenic Signaling Pathway
Source: MDPI journal article supplement (doi:10.3390/ijms24010821), 2023-01-03
Supplement: s1 [file s1]

**Supplementary Table S1.** Docking cluster, element, fullfitness, estimate  $\Delta G$  between 2Y9X and pinostrobin using SwissDock.

| Cluster | Element | FullFitness<br>(kcal/mol) | Estimated<br>$\Delta G$<br>(kcal/mol) | Cluster | Element | FullFitness<br>(kcal/mol) | Estimated<br>$\Delta G$<br>(kcal/mol) | Cluster | Element | FullFitness<br>(kcal/mol) | Estimated<br>$\Delta G$<br>(kcal/mol) |
|---------|---------|---------------------------|---------------------------------------|---------|---------|---------------------------|---------------------------------------|---------|---------|---------------------------|---------------------------------------|
| 0       | 0       | -940.18                   | -6.48                                 | 10      | 0       | -936.46                   | -6.71                                 | 21      | 5       | -933.61                   | -5.8                                  |
| 0       | 1       | -940.18                   | -6.48                                 | 10      | 1       | -916.21                   | -5.64                                 | 21      | 6       | -933.61                   | -5.8                                  |
| 0       | 2       | -938.88                   | -6.28                                 | 11      | 0       | -936.05                   | -6.47                                 | 21      | 7       | -933.58                   | -5.79                                 |
| 0       | 3       | -938.88                   | -6.28                                 | 11      | 1       | -936.03                   | -6.45                                 | 22      | 0       | -933.93                   | -6.24                                 |
| 0       | 4       | -937.53                   | -6.12                                 | 11      | 2       | -935.93                   | -6.45                                 | 22      | 1       | -933.86                   | -6.25                                 |
| 0       | 5       | -937.53                   | -6.12                                 | 11      | 3       | -935.93                   | -6.45                                 | 22      | 2       | -933.85                   | -6.26                                 |
| 0       | 6       | -937.53                   | -6.12                                 | 11      | 4       | -933.76                   | -5.98                                 | 22      | 3       | -933.81                   | -6.24                                 |
| 0       | 7       | -937.53                   | -6.12                                 | 11      | 5       | -933.62                   | -6                                    | 22      | 4       | -933.58                   | -6.22                                 |
| 1       | 0       | -940.08                   | -7.5                                  | 11      | 6       | -933.41                   | -5.97                                 | 22      | 5       | -929.12                   | -6.26                                 |
| 1       | 1       | -939.94                   | -7.48                                 | 11      | 7       | -933.41                   | -5.97                                 | 22      | 6       | -927.83                   | -5.82                                 |
| 1       | 2       | -939.85                   | -7.49                                 | 11      | 8       | -933.27                   | -6.21                                 | 22      | 7       | -927.74                   | -5.87                                 |
| 1       | 3       | -939.43                   | -7.48                                 | 11      | 9       | -932.92                   | -5.96                                 | 23      | 0       | -933.9                    | -6.27                                 |
| 1       | 4       | -939.11                   | -7.46                                 | 11      | 10      | -932.76                   | -5.92                                 | 23      | 1       | -933.86                   | -6.27                                 |
| 1       | 5       | -931.88                   | -6.53                                 | 11      | 11      | -932.67                   | -5.92                                 | 23      | 2       | -933.84                   | -6.25                                 |
| 1       | 6       | -931.5                    | -6.92                                 | 11      | 12      | -932.65                   | -5.93                                 | 23      | 3       | -931.07                   | -6.43                                 |
| 2       | 0       | -937.93                   | -7.2                                  | 12      | 0       | -935.7                    | -6.26                                 | 23      | 4       | -930.61                   | -6.24                                 |
| 2       | 1       | -933.86                   | -6.52                                 | 12      | 1       | -935.67                   | -6.25                                 | 23      | 5       | -930.6                    | -6.46                                 |
| 2       | 2       | -933.8                    | -6.5                                  | 12      | 2       | -935.6                    | -6.23                                 | 23      | 6       | -930.55                   | -6.46                                 |
| 2       | 3       | -933.71                   | -6.5                                  | 12      | 3       | -930.39                   | -5.75                                 | 23      | 7       | -930.55                   | -6.24                                 |
| 2       | 4       | -923.01                   | -5.37                                 | 12      | 4       | -929.84                   | -5.66                                 | 24      | 0       | -933.76                   | -5.86                                 |
| 2       | 5       | -922.98                   | -5.37                                 | 12      | 5       | -929.53                   | -5.61                                 | 24      | 1       | -933.47                   | -5.83                                 |
| 2       | 6       | -922.97                   | -5.36                                 | 12      | 6       | -929.34                   | -5.61                                 | 24      | 2       | -933.47                   | -5.83                                 |
| 2       | 7       | -921.46                   | -5.33                                 | 12      | 7       | -929.2                    | -5.58                                 | 24      | 3       | -933.45                   | -5.83                                 |

|   |    |         |       |    |   |         |       |    |   |         |       |
|---|----|---------|-------|----|---|---------|-------|----|---|---------|-------|
| 3 | 0  | -937.83 | -6.51 | 13 | 0 | -935.46 | -5.88 | 24 | 4 | -933.45 | -5.83 |
| 3 | 1  | -936.12 | -6.39 | 13 | 1 | -935.46 | -5.88 | 24 | 5 | -933.45 | -5.83 |
| 3 | 2  | -936.12 | -6.39 | 13 | 2 | -935.46 | -5.88 | 24 | 6 | -933.45 | -5.83 |
| 3 | 3  | -936.12 | -6.39 | 13 | 3 | -935.46 | -5.88 | 24 | 7 | -933.45 | -5.83 |
| 3 | 4  | -935.67 | -6.36 | 13 | 4 | -935.46 | -5.88 | 25 | 0 | -933.43 | -6.06 |
| 3 | 5  | -935.67 | -6.36 | 13 | 5 | -935.45 | -5.88 | 25 | 1 | -933.43 | -6.06 |
| 3 | 6  | -935.67 | -6.36 | 13 | 6 | -935.45 | -5.88 | 25 | 2 | -933.43 | -6.06 |
| 3 | 7  | -935.67 | -6.36 | 13 | 7 | -935.45 | -5.88 | 25 | 3 | -933.4  | -6.07 |
| 4 | 0  | -937.22 | -6.58 | 14 | 0 | -935.32 | -6.53 | 25 | 4 | -933.4  | -6.07 |
| 4 | 1  | -937.13 | -6.57 | 14 | 1 | -935.3  | -6.53 | 25 | 5 | -933.4  | -6.07 |
| 4 | 2  | -937.03 | -6.56 | 14 | 2 | -929.03 | -5.86 | 25 | 6 | -933.27 | -6.05 |
| 4 | 3  | -936.98 | -6.55 | 14 | 3 | -927.09 | -6.39 | 25 | 7 | -933.27 | -6.05 |
| 4 | 4  | -936.64 | -6.55 | 14 | 4 | -924.84 | -5.78 | 26 | 0 | -933.43 | -6.55 |
| 4 | 5  | -931.18 | -6.18 | 14 | 5 | -924.12 | -5.82 | 26 | 1 | -933.05 | -6.58 |
| 4 | 6  | -930.67 | -6.16 | 14 | 6 | -923.32 | -5.51 | 26 | 2 | -932.18 | -6.6  |
| 4 | 7  | -930.58 | -6.14 | 14 | 7 | -921.23 | -5.87 | 26 | 3 | -927.48 | -5.95 |
| 5 | 0  | -937.21 | -6.24 | 15 | 0 | -935.28 | -6.58 | 26 | 4 | -926.58 | -6.16 |
| 5 | 1  | -937.21 | -6.24 | 15 | 1 | -935.25 | -6.58 | 26 | 5 | -925.11 | -6.07 |
| 5 | 2  | -937.17 | -6.24 | 15 | 2 | -935.25 | -6.58 | 27 | 0 | -933.35 | -5.79 |
| 5 | 3  | -937.17 | -6.24 | 15 | 3 | -927.83 | -6.07 | 27 | 1 | -933.35 | -5.79 |
| 5 | 4  | -937.16 | -6.24 | 15 | 4 | -927.83 | -6.07 | 27 | 2 | -933.35 | -5.79 |
| 5 | 5  | -937.16 | -6.24 | 15 | 5 | -925.22 | -5.87 | 27 | 3 | -933.35 | -5.79 |
| 5 | 6  | -937.16 | -6.24 | 15 | 6 | -924.86 | -5.81 | 27 | 4 | -933.33 | -5.79 |
| 5 | 7  | -937.16 | -6.24 | 15 | 7 | -924.86 | -5.81 | 27 | 5 | -933.33 | -5.79 |
| 5 | 8  | -933.73 | -6.05 | 16 | 0 | -934.95 | -5.79 | 27 | 6 | -933.33 | -5.79 |
| 5 | 9  | -933.49 | -6.05 | 16 | 1 | -934.95 | -5.79 | 27 | 7 | -933.33 | -5.79 |
| 5 | 10 | -933.32 | -6.05 | 16 | 2 | -934.76 | -5.75 | 28 | 0 | -933.2  | -6.58 |

|   |   |         |       |    |   |         |       |    |   |         |       |
|---|---|---------|-------|----|---|---------|-------|----|---|---------|-------|
| 6 | 0 | -937.15 | -6.73 | 16 | 3 | -934.76 | -5.75 | 28 | 1 | -933.19 | -6.58 |
| 6 | 1 | -936.99 | -6.72 | 16 | 4 | -934.76 | -5.75 | 28 | 2 | -933.18 | -6.59 |
| 6 | 2 | -936.87 | -6.71 | 16 | 5 | -933.77 | -5.67 | 28 | 3 | -933.18 | -6.57 |
| 6 | 3 | -936.79 | -6.71 | 16 | 6 | -933.77 | -5.67 | 28 | 4 | -932.93 | -6.66 |
| 6 | 4 | -929.35 | -6.25 | 16 | 7 | -933.77 | -5.67 | 28 | 5 | -931.65 | -6.83 |
| 6 | 5 | -929.33 | -6.26 | 17 | 0 | -934.78 | -6.49 | 28 | 6 | -931.64 | -6.82 |
| 6 | 6 | -929.33 | -6.26 | 17 | 1 | -934.71 | -6.51 | 29 | 0 | -932.6  | -6.47 |
| 6 | 7 | -929.3  | -6.27 | 17 | 2 | -934.66 | -6.5  | 29 | 1 | -932.6  | -6.47 |
| 7 | 0 | -936.92 | -6.14 | 17 | 3 | -934.65 | -6.49 | 29 | 2 | -932.6  | -6.47 |
| 7 | 1 | -936.92 | -6.14 | 17 | 4 | -933.98 | -6.38 | 29 | 3 | -932.6  | -6.47 |
| 7 | 2 | -936.92 | -6.14 | 17 | 5 | -933.93 | -6.42 | 29 | 4 | -932.6  | -6.47 |
| 7 | 3 | -936.92 | -6.14 | 17 | 6 | -933.9  | -6.42 | 29 | 5 | -932.51 | -6.46 |
| 7 | 4 | -936.91 | -6.14 | 17 | 7 | -933.75 | -6.38 | 29 | 6 | -932.51 | -6.46 |
| 7 | 5 | -936.91 | -6.14 | 18 | 0 | -934.67 | -6.4  | 29 | 7 | -932.51 | -6.46 |
| 7 | 6 | -936.91 | -6.14 | 18 | 1 | -934.53 | -6.39 | 29 | 8 | -929.96 | -6.03 |
| 7 | 7 | -936.79 | -6.13 | 18 | 2 | -934.45 | -6.39 | 29 | 9 | -929.02 | -6.03 |
| 8 | 0 | -936.8  | -6.66 | 18 | 3 | -933.78 | -6.29 | 30 | 0 | -931.24 | -6    |
| 8 | 1 | -935.89 | -6.54 | 18 | 4 | -930.83 | -6    | 31 | 0 | -930.54 | -6.16 |
| 8 | 2 | -935.82 | -6.54 | 18 | 5 | -930.1  | -5.93 | 31 | 1 | -927.88 | -5.94 |
| 8 | 3 | -935.57 | -6.52 | 18 | 6 | -929.27 | -6.03 | 31 | 2 | -926.91 | -6    |
| 8 | 4 | -935.48 | -6.54 | 18 | 7 | -928.21 | -5.85 | 32 | 0 | -927    | -6.09 |
| 8 | 5 | -934.8  | -6.45 | 19 | 0 | -934.18 | -6.05 | 33 | 0 | -923.94 | -5.95 |
| 8 | 6 | -934    | -6.38 | 19 | 1 | -934.18 | -6.05 | 33 | 1 | -921.56 | -7.07 |
| 8 | 7 | -933.3  | -6.4  | 19 | 2 | -934.18 | -6.05 | 33 | 2 | -919.93 | -6.32 |
| 9 | 0 | -936.6  | -6.52 | 19 | 3 | -934.18 | -6.05 | 33 | 3 | -908.27 | -5.03 |
| 9 | 1 | -936.59 | -6.54 | 19 | 4 | -934    | -6.06 | 33 | 4 | -897.72 | -4.85 |
| 9 | 2 | -936.51 | -6.51 | 19 | 5 | -933    | -6.11 | 33 | 5 | -897.72 | -4.84 |

|   |    |         |       |    |   |         |       |                                                                                     |   |         |       |
|---|----|---------|-------|----|---|---------|-------|-------------------------------------------------------------------------------------|---|---------|-------|
| 9 | 3  | -936.44 | -6.51 | 19 | 6 | -933    | -6.11 | 34                                                                                  | 0 | -912.73 | -5.73 |
| 9 | 4  | -936.42 | -6.53 | 19 | 7 | -933    | -6.11 | 34                                                                                  | 0 | -912.73 | -5.73 |
| 9 | 5  | -935.99 | -6.46 | 20 | 0 | -934    | -6.38 | 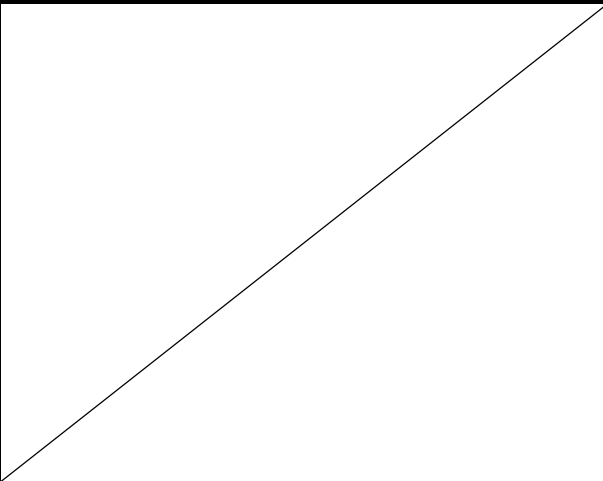 |   |         |       |
| 9 | 6  | -935.8  | -6.47 | 20 | 1 | -933.99 | -6.38 |                                                                                     |   |         |       |
| 9 | 7  | -935.8  | -6.47 | 20 | 2 | -933.43 | -6.4  |                                                                                     |   |         |       |
| 9 | 8  | -935.8  | -6.44 | 20 | 3 | -933.38 | -6.4  |                                                                                     |   |         |       |
| 9 | 9  | -935.8  | -6.44 | 20 | 4 | -931.26 | -6.21 |                                                                                     |   |         |       |
| 9 | 10 | -934.7  | -6.22 | 21 | 0 | -933.94 | -5.82 |                                                                                     |   |         |       |
| 9 | 11 | -934.26 | -6.16 | 21 | 1 | -933.89 | -5.81 |                                                                                     |   |         |       |
| 9 | 12 | -933.28 | -6.43 | 21 | 2 | -933.89 | -5.81 |                                                                                     |   |         |       |
| 9 | 13 | -933.23 | -6.47 | 21 | 3 | -933.62 | -5.8  |                                                                                     |   |         |       |
| 9 | 14 | -933.18 | -6.47 | 21 | 4 | -933.62 | -5.8  |                                                                                     |   |         |       |
